# Supplementary material for: K2MgMoP2O10 and K3Mg2MoP3O14: two new molybdophosphates exhibiting different optical anisotropies induced by variable dimensionality of the anion framework
Source: Royal Society of Chemistry journal article supplement (doi:10.1039/d4dt01026d), 2024-01-01

## Electronic Supplementary Information

### **$K_2MgMoP_2O_{10}$ and $K_3Mg_2MoP_3O_{14}$ : two new molybdophosphates exhibiting different optical anisotropy induced by variable dimensionality of the anion framework**

Zhixia Gao,<sup>a</sup> Qiuyuan Feng,<sup>a</sup> Juanjuan Lu,<sup>b</sup> Hong Du<sup>\*a,c</sup>

<sup>a</sup>College of Chemistry and Chemical Engineering, Xinjiang Normal University, Urumqi, 830054, P. R. China.

<sup>b</sup>Xinjiang Technical Institute of Physics & Chemistry, Chinese Academy of Sciences, Xinjiang Key Laboratory of Functional Crystal Materials, Urumqi 830011, China.

<sup>c</sup>Xinjiang Key Laboratory of Energy Storage and Photoelectrocatalytic Materials, Urumqi, 830054, China.

\*E-mails: 175790509@qq.com (Hong Du)

Table S1. Crystal data and structure refinement for two new compounds.

|                                                            |                                                                      |                                                                    |
|------------------------------------------------------------|----------------------------------------------------------------------|--------------------------------------------------------------------|
| Empirical formula                                          | $K_2MgMoP_2O_{10}$                                                   | $K_3Mg_2MoP_3O_{14}$                                               |
| Formula weight                                             | 420.39                                                               | 584.52                                                             |
| Temperature (K)                                            | 298                                                                  | 298                                                                |
| Crystal system                                             | Monoclinic                                                           | Orthorhombic                                                       |
| Space group                                                | $P2_1/n$                                                             | $Pnma$                                                             |
| $a / \text{\AA}$                                           | 8.7629(18)                                                           | 16.4088(10)                                                        |
| $b / \text{\AA}$                                           | 9.7379(16)                                                           | 15.8303(10)                                                        |
| $c / \text{\AA}$                                           | 10.6366(19)                                                          | 5.4483(5)                                                          |
| $\alpha / ^\circ$                                          | 90                                                                   | 90                                                                 |
| $\beta / ^\circ$                                           | 92.593(9)                                                            | 90                                                                 |
| $\gamma / ^\circ$                                          | 90                                                                   | 90                                                                 |
| $V / \text{\AA}^3$                                         | 906.7(3)                                                             | 1415.23(18)                                                        |
| $Z$                                                        | 4                                                                    | 4                                                                  |
| Calculated density ( $\text{g}/\text{cm}^3$ )              | 3.080                                                                | 2.743                                                              |
| $\mu$ ( $\text{mm}^{-1}$ )                                 | 2.828                                                                | 2.316                                                              |
| $F(000)$                                                   | 808                                                                  | 1131                                                               |
| Theta range for data collection                            | 2.837 to 27.544°                                                     | 2.482 to 27.525°                                                   |
| Index ranges                                               | $-11 \leq h \leq 11$<br>$-12 \leq k \leq 12$<br>$-13 \leq l \leq 13$ | $-20 \leq h \leq 21$<br>$-20 \leq k \leq 20$<br>$-7 \leq l \leq 6$ |
| Reflections collected                                      | 13912                                                                | 10032                                                              |
| Independent reflections                                    | 2089 [ $R_{\text{int}} = 0.0831$ ]                                   | 1684 [ $R_{\text{int}} = 0.1215$ ]                                 |
| Completeness (%)                                           | 100.0                                                                | 99.9                                                               |
| Goodness-of-fit on $F^2$                                   | 1.029                                                                | 1.074                                                              |
| Final $R$ indices [ $I > 2\sigma(I)$ ] <sup>a</sup>        | $R_1 = 0.0327$<br>$wR_2 = 0.0620$                                    | $R_1 = 0.0466$<br>$wR_2 = 0.1053$                                  |
| $R$ indices (all data) <sup>a</sup>                        | $R_1 = 0.0477$<br>$wR_2 = 0.0671$                                    | $R_1 = 0.0710$<br>$wR_2 = 0.1162$                                  |
| largest diff. peak/hole ( $\text{e}\cdot\text{\AA}^{-3}$ ) | 0.641 / -0.817                                                       | 0.783 / -1.301                                                     |

<sup>a</sup>  $R_1 = \sum ||F_o| - |F_c|| / \sum |F_o|$  and  $wR_2 = [\sum w(F_o^2 - F_c^2)^2 / \sum wF_o^4]^{1/2}$  for  $F_o^2 > 2\sigma(F_o^2)$

Table S2. Atomic coordinates ( $\times 10^4$ ) and equivalent isotropic displacement parameters ( $\text{\AA}^2 \times 10^3$ ) and bond valence sum (BVS)\* calculations for  $\text{K}_2\text{MgMoP}_2\text{O}_{10}$  and  $\text{K}_3\text{Mg}_2\text{MoP}_3\text{O}_{14}$ . U(eq) is defined as one third of the trace of the orthogonalized  $U_{ij}$  tensor.

| Atoms                                                              | x       | y       | z        | U(eq) | BVS   |
|--------------------------------------------------------------------|---------|---------|----------|-------|-------|
| <b><math>\text{K}_2\text{MgMoP}_2\text{O}_{10}</math></b>          |         |         |          |       |       |
| K(1)                                                               | -65(1)  | 6989(1) | 6955(1)  | 22(1) | 1.172 |
| K(2)                                                               | 9551(2) | 2868(1) | 9008(1)  | 32(1) | 1.060 |
| Mg(1)                                                              | 3209(2) | 5437(2) | 8637(1)  | 10(1) | 2.099 |
| Mo(1)                                                              | 2479(1) | 6261(1) | 4236(1)  | 10(1) | 6.140 |
| P(1)                                                               | 7004(1) | 5453(1) | 8550(1)  | 10(1) | 5.046 |
| P(2)                                                               | 1643(1) | 3775(1) | 6138(1)  | 9(1)  | 5.120 |
| O(1)                                                               | 2462(4) | 7076(3) | 5652(3)  | 16(1) | 2.167 |
| O(2)                                                               | 4385(4) | 6241(4) | 4004(3)  | 20(1) | 2.082 |
| O(3)                                                               | 2330(3) | 4380(3) | 4918(3)  | 12(1) | 2.117 |
| O(4)                                                               | 1984(4) | 4695(3) | 7255(3)  | 18(1) | 2.052 |
| O(5)                                                               | -69(4)  | 3696(3) | 5857(3)  | 19(1) | 1.995 |
| O(6)                                                               | 2330(4) | 2361(3) | 6313(3)  | 16(1) | 2.011 |
| O(7)                                                               | 5340(4) | 5041(3) | 8492(3)  | 21(1) | 1.964 |
| O(8)                                                               | 7172(4) | 6998(3) | 8207(3)  | 16(1) | 2.190 |
| O(9)                                                               | 7920(4) | 4679(3) | 7573(3)  | 12(1) | 2.085 |
| O(10)                                                              | 7754(4) | 5169(3) | 9840(3)  | 16(1) | 1.976 |
| <b><math>\text{K}_3\text{Mg}_2\text{MoP}_3\text{O}_{14}</math></b> |         |         |          |       |       |
| K(1)                                                               | 7105(2) | 2500    | 2611(7)  | 96(1) | 0.724 |
| K(2)                                                               | 4938(1) | 1112(1) | 2726(2)  | 22(1) | 1.208 |
| Mg(1)                                                              | 6590(1) | 4382(1) | 7230(3)  | 14(1) | 2.252 |
| Mo(1)                                                              | 8955(1) | 2500    | 6802(1)  | 16(1) | 5.876 |
| P(1)                                                               | 5715(1) | 2500    | 7248(4)  | 18(1) | 4.992 |
| P(2)                                                               | 8616(1) | 4556(1) | 7206(3)  | 15(1) | 5.204 |
| O(1)                                                               | 4897(3) | 2500    | 5765(11) | 21(1) | 2.225 |
| O(2)                                                               | 5436(5) | 2500    | 9925(12) | 40(2) | 1.672 |
| O(3)                                                               | 6187(2) | 3283(2) | 6460(9)  | 27(1) | 2.071 |
| O(4)                                                               | 8070(3) | 2500    | 8352(12) | 27(1) | 2.007 |
| O(5)                                                               | 7734(2) | 4329(3) | 7083(8)  | 30(1) | 2.001 |
| O(6)                                                               | 8861(2) | 4934(2) | 9633(8)  | 26(1) | 2.159 |
| O(7)                                                               | 8865(2) | 5152(2) | 5150(8)  | 25(1) | 2.076 |
| O(8)                                                               | 9142(2) | 3740(2) | 6902(8)  | 27(1) | 2.164 |
| O(9)                                                               | 8706(4) | 2500    | 3758(12) | 35(2) | 2.077 |

(BVS)\*: The bond valence sums were calculated using the formula  $V_i = \sum S_{ij} = \sum \exp[(r_0 - r_{ij}) / B]$ , where  $S_{ij}$  is the bond valence associated with bond length  $r_{ij}$ , and  $r_0$  and  $B$  (usually 0.37) are empirically determined parameters.

Table S3. Selected bond distances (Å) and angles (deg) for K<sub>2</sub>MgMoP<sub>2</sub>O<sub>10</sub>.

|                    |            |                     |            |
|--------------------|------------|---------------------|------------|
| K(1)-O(1)          | 2.667(3)   | Mg(1)-O(4)          | 1.921(3)   |
| K(1)-O(2)#3        | 2.837(3)   | Mg(1)-O(6)#4        | 1.933(3)   |
| K(1)-O(3)#2        | 3.054(3)   | Mg(1)-O(7)          | 1.919(4)   |
| K(1)-O(4)          | 2.875(3)   | Mg(1)-O(10)#9       | 1.952(3)   |
| K(1)-O(5)          | 3.413(4)   | Mo(1)-O(1)          | 1.704(3)   |
| K(1)-O(5)#2        | 3.072(3)   | Mo(1)-O(2)          | 1.699(3)   |
| K(1)-O(6)#4        | 2.978(3)   | Mo(1)-O(3)          | 1.977(3)   |
| K(1)-O(7)#4        | 3.018(3)   | Mo(1)-O(5)#2        | 2.110(3)   |
| K(1)-O(8)#1        | 2.815(3)   | Mo(1)-O(8)#10       | 2.029(3)   |
| K(1)-O(9)#1        | 2.952(3)   | Mo(1)-O(9)#11       | 2.145(3)   |
| K(2)-O(1)#5        | 2.737(4)   | P(1)-O(7)           | 1.511(3)   |
| K(2)-O(2)#5        | 2.771(3)   | P(1)-O(8)           | 1.558(3)   |
| K(2)-O(3)#7        | 3.112(3)   | P(1)-O(9)           | 1.539(3)   |
| K(2)-O(4)#6        | 3.398(4)   | P(1)-O(10)          | 1.519(3)   |
| K(2)-O(6)#7        | 3.206(3)   | P(2)-O(3)           | 1.570(3)   |
| K(2)-O(8)#5        | 2.868(3)   | P(2)-O(4)           | 1.508(3)   |
| K(2)-O(9)          | 2.699(3)   | P(2)-O(5)           | 1.518(3)   |
| K(2)-O(10)         | 2.899(3)   | P(2)-O(6)           | 1.511(3)   |
| K(2)-O(10)#8       | 3.236(4)   |                     |            |
| O(1)-K(1)-O(2)#3   | 123.63(10) | O(2)#5-K(2)-O(10)#8 | 80.45(9)   |
| O(1)-K(1)-O(3)#2   | 101.86(9)  | O(3)#7-K(2)-O(4)#6  | 162.86(8)  |
| O(1)-K(1)-O(4)     | 63.45(10)  | O(3)#7-K(2)-O(6)#7  | 45.86(8)   |
| O(1)-K(1)-O(5)     | 80.80(9)   | O(3)#7-K(2)-O(10)#8 | 138.90(8)  |
| O(1)-K(1)-O(5)#2   | 55.37(9)   | O(6)#7-K(2)-O(4)#6  | 150.87(8)  |
| O(1)-K(1)-O(6)#4   | 69.71(10)  | O(6)#7-K(2)-O(10)#8 | 102.08(8)  |
| O(1)-K(1)-O(7)#4   | 87.07(9)   | O(8)#5-K(2)-O(3)#7  | 74.60(9)   |
| O(1)-K(1)-O(8)#1   | 176.32(10) | O(8)#5-K(2)-O(4)#6  | 91.38(9)   |
| O(1)-K(1)-O(9)#1   | 131.24(9)  | O(8)#5-K(2)-O(6)#7  | 107.01(10) |
| O(2)#3-K(1)-O(3)#2 | 129.67(10) | O(8)#5-K(2)-O(10)   | 101.89(10) |
| O(2)#3-K(1)-O(4)   | 120.91(10) | O(8)#5-K(2)-O(10)#8 | 146.47(9)  |
| O(2)#3-K(1)-O(5)   | 146.74(9)  | O(9)-K(2)-O(1)#5    | 137.51(11) |
| O(2)#3-K(1)-O(5)#2 | 153.54(10) | O(9)-K(2)-O(2)#5    | 163.10(10) |
| O(2)#3-K(1)-O(6)#4 | 67.11(9)   | O(9)-K(2)-O(3)#7    | 108.25(10) |
| O(2)#3-K(1)-O(7)#4 | 60.50(9)   | O(9)-K(2)-O(4)#6    | 71.15(9)   |
| O(2)#3-K(1)-O(9)#1 | 99.66(9)   | O(9)-K(2)-O(6)#7    | 98.85(9)   |
| O(3)#2-K(1)-O(5)   | 51.40(8)   | O(9)-K(2)-O(8)#5    | 58.87(9)   |
| O(3)#2-K(1)-O(5)#2 | 47.35(8)   | O(9)-K(2)-O(10)     | 52.18(8)   |
| O(4)-K(1)-O(3)#2   | 96.76(9)   | O(9)-K(2)-O(10)#8   | 100.76(9)  |
| O(4)-K(1)-O(5)     | 45.49(8)   | O(10)-K(2)-O(3)#7   | 95.33(9)   |
| O(4)-K(1)-O(5)#2   | 83.58(9)   | O(10)#8-K(2)-O(4)#6 | 55.46(8)   |
| O(4)-K(1)-O(6)#4   | 62.90(9)   | O(10)-K(2)-O(4)#6   | 97.22(9)   |
| O(4)-K(1)-O(7)#4   | 145.85(10) | O(10)-K(2)-O(6)#7   | 57.56(8)   |
| O(4)-K(1)-O(9)#1   | 76.12(9)   | O(10)-K(2)-O(10)#8  | 79.92(10)  |

|                     |            |                       |            |
|---------------------|------------|-----------------------|------------|
| O(5)#2-K(1)-O(5)    | 57.47(10)  | O(4)-Mg(1)-O(6)#4     | 104.86(15) |
| O(6)#4-K(1)-O(3)#2  | 159.65(9)  | O(4)-Mg(1)-O(7)       | 112.01(16) |
| O(6)#4-K(1)-O(5)    | 108.31(8)  | O(4)-Mg(1)-O(10)#9    | 105.86(15) |
| O(6)#4-K(1)-O(5)#2  | 124.29(9)  | O(6)#4-Mg(1)-O(10)#9  | 98.90(14)  |
| O(6)#4-K(1)-O(7)#4  | 91.94(9)   | O(7)-Mg(1)-O(6)#4     | 115.91(15) |
| O(7)#4-K(1)-O(3)#2  | 106.40(9)  | O(7)-Mg(1)-O(10)#9    | 117.69(16) |
| O(7)#4-K(1)-O(5)    | 150.77(9)  | O(1)-Mo(1)-O(3)       | 95.95(13)  |
| O(7)#4-K(1)-O(5)#2  | 93.83(9)   | O(1)-Mo(1)-O(5)#2     | 89.06(14)  |
| O(8)#1-K(1)-O(2)#3  | 56.99(9)   | O(1)-Mo(1)-O(8)#10    | 94.69(13)  |
| O(8)#1-K(1)-O(3)#2  | 76.26(9)   | O(1)-Mo(1)-O(9)#11    | 169.91(14) |
| O(8)#1-K(1)-O(4)    | 119.74(10) | O(2)-Mo(1)-O(1)       | 100.48(16) |
| O(8)#1-K(1)-O(5)    | 100.21(9)  | O(2)-Mo(1)-O(3)       | 97.14(15)  |
| O(8)#1-K(1)-O(5)#2  | 122.20(10) | O(2)-Mo(1)-O(5)#2     | 168.96(13) |
| O(8)#1-K(1)-O(6)#4  | 113.10(10) | O(2)-Mo(1)-O(8)#10    | 92.21(15)  |
| O(8)#1-K(1)-O(7)#4  | 90.42(9)   | O(2)-Mo(1)-O(9)#11    | 89.21(13)  |
| O(8)#1-K(1)-O(9)#1  | 50.30(8)   | O(3)-Mo(1)-O(5)#2     | 87.30(13)  |
| O(9)#1-K(1)-O(3)#2  | 55.61(8)   | O(3)-Mo(1)-O(8)#10    | 164.32(13) |
| O(9)#1-K(1)-O(5)    | 50.86(8)   | O(3)-Mo(1)-O(9)#11    | 85.57(11)  |
| O(9)#1-K(1)-O(5)#2  | 95.80(9)   | O(5)#2-Mo(1)-O(9)#11  | 81.03(12)  |
| O(9)#1-K(1)-O(6)#4  | 115.31(9)  | O(8)#10-Mo(1)-O(5)#2  | 81.38(13)  |
| O(9)#1-K(1)-O(7)#4  | 137.85(10) | O(8)#10-Mo(1)-O(9)#11 | 81.99(11)  |
| O(1)#5-K(2)-O(2)#5  | 56.71(9)   | O(7)-P(1)-O(8)        | 110.36(19) |
| O(1)#5-K(2)-O(3)#7  | 111.62(9)  | O(7)-P(1)-O(9)        | 112.02(18) |
| O(1)#5-K(2)-O(4)#6  | 66.41(9)   | O(7)-P(1)-O(10)       | 111.48(19) |
| O(1)#5-K(2)-O(6)#7  | 119.30(9)  | O(9)-P(1)-O(8)        | 104.85(17) |
| O(1)#5-K(2)-O(8)#5  | 119.34(10) | O(10)-P(1)-O(8)       | 110.25(18) |
| O(1)#5-K(2)-O(10)   | 134.96(10) | O(10)-P(1)-O(9)       | 107.65(17) |
| O(1)#5-K(2)-O(10)#8 | 55.90(9)   | O(4)-P(2)-O(3)        | 111.00(18) |
| O(2)#5-K(2)-O(3)#7  | 63.51(9)   | O(4)-P(2)-O(5)        | 110.14(19) |
| O(2)#5-K(2)-O(4)#6  | 121.35(10) | O(4)-P(2)-O(6)        | 112.38(18) |
| O(2)#5-K(2)-O(6)#7  | 64.63(9)   | O(5)-P(2)-O(3)        | 105.59(17) |
| O(2)#5-K(2)-O(8)#5  | 127.21(10) | O(6)-P(2)-O(3)        | 106.15(17) |
| O(2)#5-K(2)-O(10)   | 112.19(10) | O(6)-P(2)-O(5)        | 111.30(19) |

Symmetry transformations used to generate equivalent atoms:

|                             |                            |                             |
|-----------------------------|----------------------------|-----------------------------|
| #1 $x-1, y, z$              | #2 $-x, -y+1, -z+1$        | #3 $x-1/2, -y+3/2, z+1/2$   |
| #4 $-x+1/2, y+1/2, -z+3/2$  | #5 $-x+3/2, y-1/2, -z+3/2$ | #6 $x+1, y, z$              |
| #7 $x+1/2, -y+1/2, z+1/2$   | #8 $-x+2, -y+1, -z+2$      | #9 $-x+1, -y+1, -z+2$       |
| #10 $x-1/2, -y+3/2, z-1/2$  | #11 $-x+1, -y+1, -z+1$     | #12 $-x+1/2, y-1/2, -z+3/2$ |
| #13 $-x+3/2, y+1/2, -z+3/2$ | #14 $x+1/2, -y+3/2, z-1/2$ | #15 $x-1/2, -y+1/2, z-1/2$  |
| #16 $x+1/2, -y+3/2, z+1/2$  |                            |                             |

Table S4. Selected bond lengths (Å) and angles (deg.) for K<sub>3</sub>Mg<sub>2</sub>MoP<sub>3</sub>O<sub>14</sub>.

|                    |            |                     |            |
|--------------------|------------|---------------------|------------|
| K(1)-O(2)#2        | 3.105(8)   | Mg(1)-O(5)          | 1.880(4)   |
| K(1)-O(3)          | 2.865(5)   | Mg(1)-O(6)#7        | 1.929(4)   |
| K(1)-O(3)#1        | 2.865(5)   | Mg(1)-O(7)#8        | 1.906(4)   |
| K(1)-O(4)#2        | 2.809(7)   | Mo(1)-O(1)#9        | 2.035(5)   |
| K(1)-O(9)          | 2.700(7)   | Mo(1)-O(4)          | 1.679(6)   |
| K(2)-O(1)          | 2.752(4)   | Mo(1)-O(8)          | 1.987(4)   |
| K(2)-O(2)#2        | 2.797(4)   | Mo(1)-O(8)#1        | 1.987(4)   |
| K(2)-O(3)#1        | 3.042(5)   | Mo(1)-O(9)          | 1.708(6)   |
| K(2)-O(6)#3        | 2.906(4)   | P(1)-O(1)           | 1.567(5)   |
| K(2)-O(6)#4        | 2.816(4)   | P(1)-O(2)           | 1.529(6)   |
| K(2)-O(7)#3        | 2.853(4)   | P(1)-O(3)           | 1.523(4)   |
| K(2)-O(7)#5        | 3.092(4)   | P(1)-O(3)#1         | 1.523(4)   |
| K(2)-O(8)#4        | 3.213(5)   | P(2)-O(5)           | 1.493(4)   |
| K(2)-O(8)#5        | 2.849(5)   | P(2)-O(6)           | 1.506(4)   |
| K(2)-O(9)#6        | 3.093(5)   | P(2)-O(7)           | 1.520(4)   |
| Mg(1)-O(3)         | 1.909(4)   | P(2)-O(8)           | 1.562(4)   |
| O(3)-K(1)-O(2)#2   | 83.16(15)  | O(7)#3-K(2)-O(6)#3  | 50.72(11)  |
| O(3)#1-K(1)-O(2)#2 | 83.16(15)  | O(7)#3-K(2)-O(7)#5  | 78.35(12)  |
| O(3)-K(1)-O(3)#1   | 51.28(16)  | O(7)#3-K(2)-O(8)#4  | 140.07(11) |
| O(4)#2-K(1)-O(2)#2 | 96.2(2)    | O(7)#5-K(2)-O(8)#4  | 106.12(11) |
| O(4)#2-K(1)-O(3)   | 154.32(8)  | O(7)#3-K(2)-O(9)#6  | 134.41(15) |
| O(4)#2-K(1)-O(3)#1 | 154.32(8)  | O(7)#5-K(2)-O(9)#6  | 87.42(12)  |
| O(9)-K(1)-O(2)#2   | 165.3(2)   | O(8)#5-K(2)-O(3)#1  | 150.99(11) |
| O(9)-K(1)-O(3)     | 110.02(19) | O(8)#5-K(2)-O(6)#3  | 132.85(12) |
| O(9)-K(1)-O(3)#1   | 110.02(19) | O(8)#5-K(2)-O(7)#3  | 85.64(12)  |
| O(9)-K(1)-O(4)#2   | 69.1(2)    | O(8)#5-K(2)-O(7)#5  | 48.99(10)  |
| O(1)-K(2)-O(2)#2   | 73.04(14)  | O(8)#5-K(2)-O(8)#4  | 127.88(14) |
| O(1)-K(2)-O(3)#1   | 50.43(12)  | O(8)#5-K(2)-O(9)#6  | 53.89(14)  |
| O(1)-K(2)-O(6)#3   | 108.31(14) | O(9)#6-K(2)-O(8)#4  | 85.45(14)  |
| O(1)-K(2)-O(6)#4   | 98.42(13)  | O(3)-Mg(1)-O(6)#7   | 102.6(2)   |
| O(1)-K(2)-O(7)#3   | 137.58(14) | O(5)-Mg(1)-O(3)     | 107.23(19) |
| O(1)-K(2)-O(7)#5   | 143.86(13) | O(5)-Mg(1)-O(6)#7   | 112.2(2)   |
| O(1)-K(2)-O(8)#4   | 51.95(12)  | O(5)-Mg(1)-O(7)#8   | 116.4(2)   |
| O(1)-K(2)-O(8)#5   | 117.09(13) | O(7)#8-Mg(1)-O(3)   | 113.6(2)   |
| O(1)-K(2)-O(9)#6   | 64.79(15)  | O(7)#8-Mg(1)-O(6)#7 | 104.16(19) |
| O(2)#2-K(2)-O(3)#1 | 85.45(17)  | O(4)-Mo(1)-O(1)#9   | 109.2(3)   |
| O(2)#2-K(2)-O(6)#3 | 120.07(17) | O(4)-Mo(1)-O(8)     | 96.89(11)  |
| O(2)#2-K(2)-O(6)#4 | 157.47(18) | O(4)-Mo(1)-O(8)#1   | 96.89(11)  |
| O(2)#2-K(2)-O(7)#3 | 87.06(14)  | O(4)-Mo(1)-O(9)     | 106.3(3)   |
| O(2)#2-K(2)-O(7)#5 | 113.47(16) | O(8)-Mo(1)-O(1)#9   | 82.23(12)  |
| O(2)#2-K(2)-O(8)#4 | 123.93(13) | O(8)#1-Mo(1)-O(1)#9 | 82.23(12)  |
| O(2)#2-K(2)-O(8)#5 | 65.56(16)  | O(8)-Mo(1)-O(8)#1   | 161.9(2)   |
| O(2)#2-K(2)-O(9)#6 | 59.36(17)  | O(9)-Mo(1)-O(1)#9   | 144.5(3)   |

|                    |            |                   |           |
|--------------------|------------|-------------------|-----------|
| O(3)#1-K(2)-O(7)#5 | 157.86(11) | O(9)-Mo(1)-O(8)   | 93.64(14) |
| O(3)#1-K(2)-O(8)#4 | 68.99(11)  | O(9)-Mo(1)-O(8)#1 | 93.64(14) |
| O(3)#1-K(2)-O(9)#6 | 113.05(12) | O(2)-P(1)-O(1)    | 103.6(4)  |
| O(6)#3-K(2)-O(3)#1 | 60.41(11)  | O(3)-P(1)-O(1)    | 106.8(2)  |
| O(6)#4-K(2)-O(3)#1 | 105.42(12) | O(3)#1-P(1)-O(1)  | 106.8(2)  |
| O(6)#4-K(2)-O(6)#3 | 82.27(12)  | O(3)-P(1)-O(2)    | 114.9(2)  |
| O(6)#3-K(2)-O(7)#5 | 98.74(11)  | O(3)#1-P(1)-O(2)  | 114.9(2)  |
| O(6)#4-K(2)-O(7)#3 | 111.73(11) | O(3)#1-P(1)-O(3)  | 109.0(3)  |
| O(6)#4-K(2)-O(7)#5 | 61.40(11)  | O(5)-P(2)-O(6)    | 113.1(2)  |
| O(6)#3-K(2)-O(8)#4 | 89.82(11)  | O(5)-P(2)-O(7)    | 112.1(2)  |
| O(6)#4-K(2)-O(8)#4 | 47.37(10)  | O(5)-P(2)-O(8)    | 109.4(2)  |
| O(6)#4-K(2)-O(8)#5 | 102.31(12) | O(6)-P(2)-O(7)    | 109.2(2)  |
| O(6)#3-K(2)-O(9)#6 | 173.10(14) | O(6)-P(2)-O(8)    | 105.9(2)  |
| O(6)#4-K(2)-O(9)#6 | 98.11(13)  | O(7)-P(2)-O(8)    | 106.7(2)  |
| O(7)#3-K(2)-O(3)#1 | 91.88(12)  |                   |           |

Symmetry transformations used to generate equivalent atoms:

|                             |                            |                             |
|-----------------------------|----------------------------|-----------------------------|
| #1 $x, -y+1/2, z$           | #2 $x, y, z-1$             | #3 $-x+3/2, y-1/2, z-1/2$   |
| #4 $x-1/2, -y+1/2, -z+3/2$  | #5 $x-1/2, -y+1/2, -z+1/2$ | #6 $x-1/2, y, -z+1/2$       |
| #7 $-x+3/2, -y+1, z-1/2$    | #8 $-x+3/2, -y+1, z+1/2$   | #9 $x+1/2, y, -z+3/2$       |
| #10 $x, y, z+1$             | #11 $x, -y+1/2, z+1$       | #12 $-x+1, y+1/2, -z+1$     |
| #13 $x+1/2, -y+1/2, -z+3/2$ | #14 $x+1/2, y, -z+1/2$     | #15 $x+1/2, -y+1/2, -z+1/2$ |
| #16 $x-1/2, y, -z+3/2$      | #17 $-x+3/2, y+1/2, z+1/2$ |                             |

Table S5. The polarization anisotropy of  $K_2MgMoP_2O_{10}$  and  $K_3Mg_2MoP_3O_{14}$ .

|                                    | $K_2MgMoP_2O_{10}$ | $K_3Mg_2MoP_3O_{14}$ |
|------------------------------------|--------------------|----------------------|
| P(1)O <sub>4</sub>                 | 2.181933635        | 1.239185939          |
| P(2)O <sub>4</sub>                 | 0.928486315        | 1.33783995           |
| MoO <sub>6</sub> /MoO <sub>5</sub> | 27.00898028        | 3.701073885          |



Fig. S1. The PXRD patterns of (a)  $K_2MgMoP_2O_{10}$ , (b)  $K_3Mg_2MoP_3O_{14}$

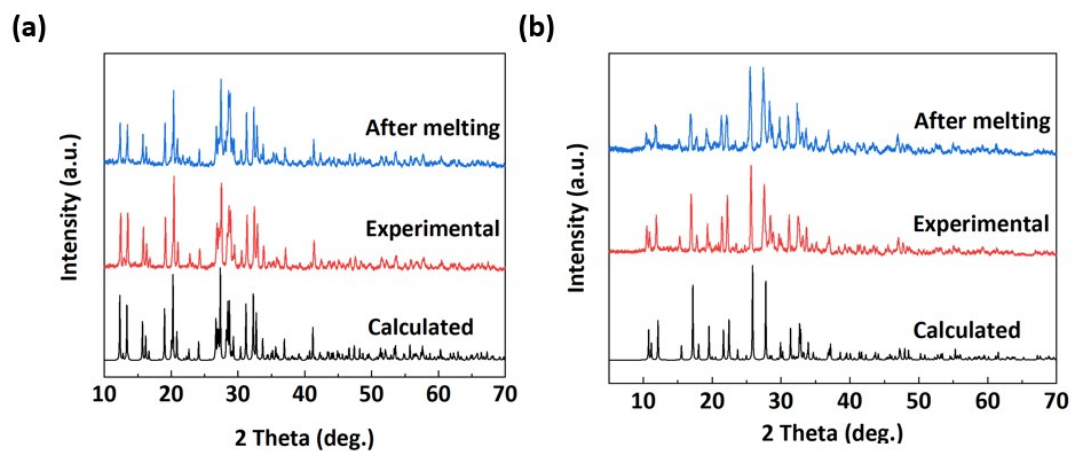

Fig. S2. The IR spectra of (a)  $K_2MgMoP_2O_{10}$ , (b)  $K_3Mg_2MoP_3O_{14}$ .

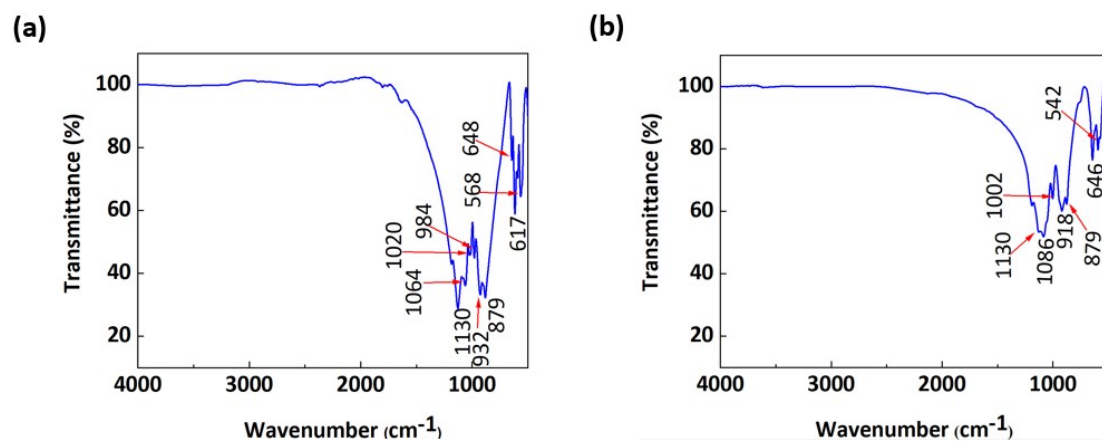

Fig. S3. TG and DSC data for (a)  $K_2MgMoP_2O_{10}$ , (b)  $K_3Mg_2MoP_3O_{14}$ .

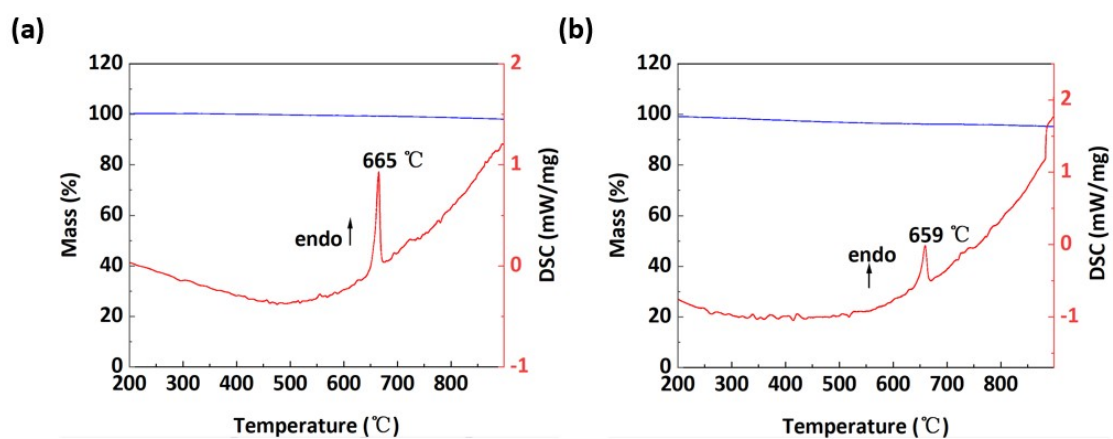

Fig. S4. Calculated band structures of the GGA method, (a)  $K_2MgMoP_2O_{10}$ , (b)  $K_3Mg_2MoP_3O_{14}$ .

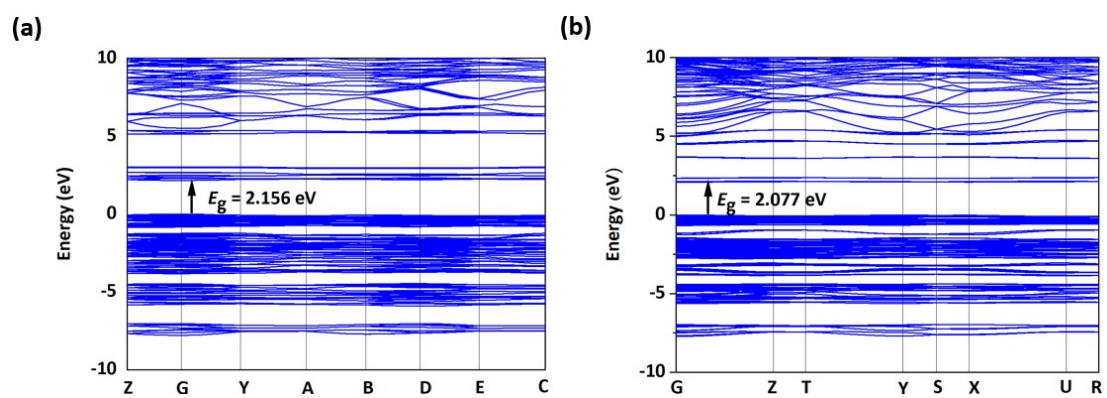

Fig. S5. (a) Original view of the crystal; (b,c) Extinction views of the crystal by negative and positive rotational compensators; (d) View of the crystal thickness; and (e) Orientation of the  $K_2MgMoP_2O_{10}$  crystal determined by X-ray single-crystal diffraction

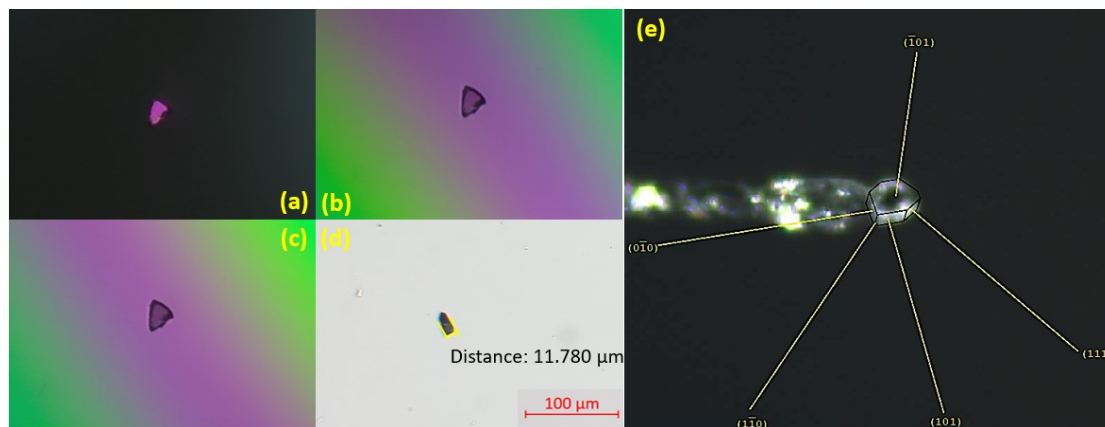

Fig. S6. REDA index ( $\zeta$ ) is used to analyze the contribution of  $K_2MgMoP_2O_{10}$  birefringence.

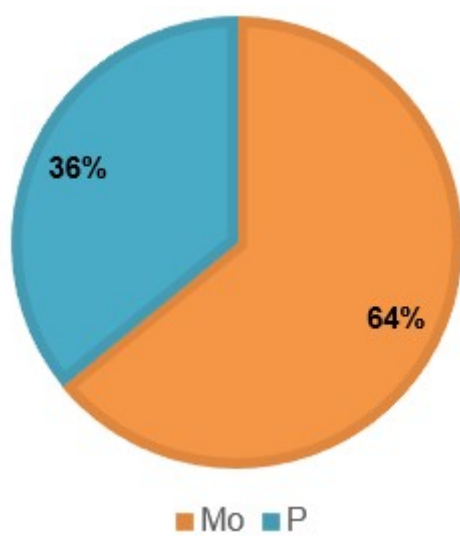

Supplement: d4dt01026d1.pdf [file d4dt01026d1.pdf]
